# Supplementary material for: scMRI Reveals Large-Scale Brain Network Abnormalities in Autism
Source: PubMed Central journal article supplement (PMC3504046; doi:10.1371/journal.pone.0049172), 2012-11-21
Supplement: pone.0049172.s002.pdf [file pone.0049172.s002.pdf]

|                | Mean Age (yrs.) | S.D. Age (yrs) | Age Range (yrs.) | 3 - 7 yrs (n) | 7 .1 - 11 yrs | 11.1 - 15 yrs | 15.1 - 19 yrs | 19.1 - 23 yrs |
|----------------|-----------------|----------------|------------------|---------------|---------------|---------------|---------------|---------------|
| <i>autism</i>  | 13.27 (5.07)    | 5.07           | 3.49 - 22.33     | 6             | 11            | 13            | 11            | 8             |
| <i>control</i> | 13.67 (5.53)    | 5.53           | 3.47 - 22.44     | 6             | 11            | 13            | 7             | 12            |

**Table S1. Group age distributions.**
