# Supplementary material for: scMRI Reveals Large-Scale Brain Network Abnormalities in Autism
Source: PubMed Central journal article supplement (PMC3504046; doi:10.1371/journal.pone.0049172), 2012-11-21
Supplement: pone.0049172.s003.pdf [file pone.0049172.s003.pdf]

|                         | x   | y   | z   | p (FWE) | T height | Peak Region          | Secondary Regions |                   |
|-------------------------|-----|-----|-----|---------|----------|----------------------|-------------------|-------------------|
| <b>SN (R FI seed)</b>   |     |     |     |         |          |                      |                   |                   |
| <i>autism</i>           | 38  | 26  | -10 | 0.000   | 93.27    | R FI                 | R Insula          |                   |
|                         | -37 | 27  | -13 | 0.000   | 8.81     | L FI                 | L Insula          | L Temporal Pole   |
|                         | -30 | 21  | -19 | 0.000   | 6.32     | L FI                 | L Insula          | L Temporal Pole   |
|                         | 10  | -6  | 49  | 0.000   | 6.31     | R SMA                | R Mid Cingulum    | R Sup Frontal     |
|                         | 10  | 13  | 50  | 0.002   | 5.6      | R SMA                | R Sup Frontal     | R Mid Cingulum    |
|                         | 9   | 27  | 49  | 0.002   | 5.67     | Medial R Sup Frontal | R SMA             | R Sup Frontal     |
|                         | -12 | -9  | 60  | 0.000   | 6.2      | L SMA                | L Precentral      | L Sup Frontal     |
|                         | -7  | 16  | 48  | 0.001   | 5.99     | L SMA                | L Sup Frontal     | L Mid Cingulum    |
|                         | -20 | 8   | 55  | 0.002   | 5.71     | L Sup Frontal        | L Mid Frontal     |                   |
|                         | -17 | 16  | 53  | 0.003   | 5.55     | L Sup Frontal        | L Mid Frontal     |                   |
|                         | -21 | 48  | -15 | 0.003   | 5.51     | L Mid Frontal Orb    | L Sup Frontal Orb | L Inf Frontal Orb |
|                         | 18  | 53  | -17 | 0.004   | 5.45     | R Sup Frontal Orb    | R Mid Frontal Orb |                   |
|                         | 20  | 56  | 1   | 0.009   | 5.24     | R Sup Frontal        | R Sup Frontal Orb | R Med Sup Frontal |
|                         | 16  | 4   | 60  | 0.009   | 5.24     | R SMA                | R Sup Frontal     |                   |
| <i>control</i>          | 38  | 26  | -10 | 0.000   | 109.52   | R FI                 | R Insula          |                   |
|                         | 23  | 59  | 2   | 0.000   | 10.99    | R Sup Frontal        | R Sup Frontal Orb |                   |
|                         | -24 | 58  | -3  | 0.000   | 10.15    | L Sup Frontal Orb    | L Sup Frontal     |                   |
|                         | -49 | -12 | -34 | 0.000   | 6.13     | L Inf Temporal       | L Mid Temporal    |                   |
|                         | 10  | -10 | 49  | 0.002   | 5.6      | R SMA                | R Mid Cingulum    |                   |
|                         | -37 | -26 | -27 | 0.003   | 5.54     | L Fusiform           | L Inf Temporal    |                   |
|                         | -36 | 7   | 47  | 0.003   | 5.52     | L Mid Frontal        | L Precentral      |                   |
|                         | 7   | 4   | 55  | 0.006   | 5.37     | R SMA                | L SMA             |                   |
| <b>DMN (R PCC seed)</b> |     |     |     |         |          |                      |                   |                   |
| <i>autism</i>           | 4   | -40 | 36  | 0.000   | 283.11   | R Mid Cingulum       | L Mid Cingulum    | B Precuneus       |
|                         | 11  | -70 | 42  | 0.000   | 8.54     | R Precuneus          | R Cuneus          |                   |
|                         | 57  | -51 | 14  | 0.000   | 7.09     | R Mid Temporal       | R Sup Temporal    |                   |
|                         | -34 | -76 | 36  | 0.000   | 6.94     | L Mid Occipital      | L Inf Parietal    |                   |
|                         | -2  | -16 | -19 | 0.000   | 7.42     | L Ventral Tegmental  |                   |                   |
|                         | -5  | -29 | 12  | 0.000   | 7.06     | L Thalamus           |                   |                   |
|                         | -13 | -25 | -22 | 0.000   | 6.82     | L Parahippo          |                   |                   |
|                         | 0   | -26 | 14  | 0.000   | 7.11     | L Thalamus           |                   |                   |
|                         | -44 | -77 | 20  | 0.000   | 6.32     | L Mid Occipital      | L Mid Temporal    | L Angular         |
|                         | -30 | -56 | 52  | 0.003   | 5.52     | L Inf Parietal       | L Sup Parietal    |                   |
|                         | -54 | 11  | -14 | 0.000   | 6.62     | L Sup Temporal Pole  |                   |                   |
|                         | 57  | -23 | -4  | 0.000   | 6.19     | R Sup Temporal       | R Mid Temporal    |                   |
|                         | 61  | -10 | -1  | 0.005   | 5.44     | R Sup Temporal       | R Heschl          |                   |
|                         | -59 | -2  | 9   | 0.001   | 5.89     | L Rolandic Oper      | L Postcentral     | L Heschl          |
|                         | -15 | -23 | -31 | 0.001   | 5.83     | L Parahippo          | L Fusiform        |                   |
|                         | 46  | -14 | 0   | 0.001   | 5.73     | R Sup Temporal       | R Insula          | R Heschl          |
|                         | -20 | 15  | -24 | 0.003   | 5.52     | L Inf Frontal Orb    | L Sup Frontal Orb |                   |
|                         | 9   | -21 | 72  | 0.004   | 5.49     | R Paracentral Lobule | R SMA             | R Precentral      |
|                         | 11  | -21 | -14 | 0.004   | 5.49     | R Parahippo          |                   |                   |
|                         | 26  | 12  | -32 | 0.006   | 5.37     | R Sup Temporal Pole  | R Parahippo       |                   |
|                         | -17 | -29 | 23  | 0.006   | 5.36     | L Caudate            |                   |                   |
|                         | 19  | -24 | -33 | 0.006   | 5.35     | R Cerebellum 3       | R Cerebellum 4,5  | R Parahippo       |
|                         | -16 | -11 | -32 | 0.006   | 5.35     | L Parahippo          | L Hippocampus     | L Fusiform        |
|                         | 40  | -17 | 13  | 0.009   | 5.25     | R Insula             | R Rolandic Oper   | R Heschl          |
|                         | -10 | -74 | 42  | 0.009   | 5.24     | L Precuneus          | L Sup Parietal    |                   |
|                         | -22 | -90 | -22 | 0.009   | 5.23     | L Cerebellum Crus    | L Lingual         | L Fusiform        |
| <i>control</i>          | 4   | -40 | 36  | 0.000   | 261.61   | R Mid Cingulum       | L Mid Cingulum    | B Precuneus       |
|                         | -9  | -52 | 64  | 0.000   | 6.97     | L Precuneus          | L Mid Cingulum    |                   |
|                         | 38  | -55 | 51  | 0.000   | 6.53     | R Inf Parietal       |                   |                   |
|                         | -18 | 54  | 37  | 0.003   | 5.58     | L Sup Frontal        | R Sup Parietal    |                   |
|                         | 7   | -50 | 2   | 0.000   | 6.09     | Vermis 4,5           | R Lingual         | R Precuneus       |
|                         | -57 | -47 | 35  | 0.000   | 6.68     | L Supramarginal      | L Inf Parietal    | L Angular         |
|                         | -56 | -30 | 42  | 0.000   | 6.63     | L Inf Parietal       | L Supramarginal   |                   |
|                         | -62 | -9  | 32  | 0.002   | 5.63     | L postcentral        | L Precentral      |                   |
|                         | 62  | 2   | 25  | 0.000   | 6.53     | R Precentral         | R Postcentral     |                   |
|                         | 52  | -50 | 42  | 0.001   | 5.99     | R Inf Parietal       | R Supramarginal   | R Angular         |
|                         | 56  | -51 | 14  | 0.000   | 6.49     | R Mid Temporal       | R Sup Temporal    |                   |
|                         | -27 | -56 | 54  | 0.000   | 6.4      | L Sup Parietal       | L Inf Parietal    |                   |
|                         | -57 | -54 | -5  | 0.001   | 5.76     | L Mid Temporal       | L Inf Temporal    |                   |
|                         | 14  | 59  | 34  | 0.003   | 5.51     | R Sup Frontal        |                   | R Angular         |
|                         | -27 | 14  | 61  | 0.004   | 5.44     | L Mid Frontal        | L Sup Frontal     |                   |
|                         | -22 | -38 | 66  | 0.005   | 5.44     | L Postcentral        | L Sup Parietal    |                   |

**Table S2. MNI coordinates and characteristics of peak voxels and associated clusters of groupwise scMRI maps, with age as a covariate in the model. FWE, family-wise error.**
