# Supplementary material for: scMRI Reveals Large-Scale Brain Network Abnormalities in Autism
Source: PubMed Central journal article supplement (PMC3504046; doi:10.1371/journal.pone.0049172), 2012-11-21
Supplement: pone.0049172.s004.pdf [file pone.0049172.s004.pdf]

|                            | x   | y   | z   | p (UC) | T height | Peak region           | Secondary Regions                            |
|----------------------------|-----|-----|-----|--------|----------|-----------------------|----------------------------------------------|
| <b>SN (R FI seed)</b>      |     |     |     |        |          |                       |                                              |
| <i>autism &gt; control</i> | -11 | -10 | 60  | 0.014  | 2.23     | L SMA                 | L Paracentral Lobule L Precentral            |
|                            | 36  | 27  | -10 | 0.020  | 2.08     | R Inf Fronal Orb (FI) | R Insula                                     |
|                            | 12  | -3  | 49  | 0.023  | 2.02     | R SMA                 | R Mid Cingulum                               |
|                            | -19 | 7   | 55  | 0.031  | 1.88     | L Sup Frontal         | L Mid Frontal                                |
|                            | 24  | 29  | -9  | 0.041  | 1.75     | R Caudate             | R Putamen R Insula                           |
|                            | -29 | 23  | -16 | 0.048  | 1.67     | L Inf Frontal Orb     | L insula                                     |
| <i>control &gt; autism</i> | 42  | 39  | -14 | 0.000  | 4.24     | R Mid Frontal Orb     | R Inf Frontal Orb (FI)                       |
|                            | 27  | 55  | 12  | 0.000  | 3.96     | R Sup Frontal         | R Mid Frontal                                |
|                            | 42  | 37  | 23  | 0.000  | 3.89     | R Mid Frontal         | R Inf Frontal Tri                            |
|                            | -8  | 51  | 14  | 0.000  | 3.61     | L Medial Sup Frontal  | L Ant Cingulate                              |
|                            | -7  | 48  | 23  | 0.001  | 3.13     | L Medial Sup Frontal  | L Sup Frontal L Ant Cingulate                |
|                            | -5  | 31  | 38  | 0.002  | 2.96     | L Medial Sup Frontal  | L Mid Cingulate                              |
|                            | 46  | 8   | -31 | 0.001  | 3.26     | R Mid Temporal Pole   | R Sup Temporal Pole                          |
|                            | -31 | 44  | 25  | 0.001  | 3.06     | L Mid Frontal         | L Sup Frontal                                |
|                            | 56  | 11  | 6   | 0.003  | 2.81     | R Inf Frontal Oper    | R Precentral                                 |
|                            | 49  | 18  | 31  | 0.006  | 2.53     | R Inf Frontal Oper    | R Inf Frontal Tri                            |
|                            | 16  | 53  | 19  | 0.036  | 1.81     | R Sup Frontal         | R Medial Sup Frontal                         |
|                            | -49 | 29  | 12  | 0.031  | 1.88     | L Inf Frontal Tri     |                                              |
|                            | 55  | 12  | 17  | 0.035  | 1.83     | R Precentral          | R Rolandic Oper                              |
|                            | -46 | 33  | 4   | 0.046  | 1.69     | L Inf Frontal Tri     | L Inf Frontal Orb (FI)                       |
|                            | 36  | 31  | 42  | 0.048  | 1.67     | R Mid Frontal         |                                              |
| <b>DMN (R PCC seed)</b>    |     |     |     |        |          |                       |                                              |
| <i>autism &gt; control</i> | 14  | -73 | 40  | 0.002  | 2.92     | R Precuneus           | R cuneus                                     |
|                            | 30  | -71 | 42  | 0.018  | 2.12     | R Sup Occipital       | R Angular R Mid Occipital                    |
|                            | 2   | -70 | 30  | 0.019  | 2.09     | R Precuneus           | L cuneus L Precuneus R cuneus                |
|                            | -32 | -77 | 35  | 0.009  | 2.39     | L Mid occipital       | L Inf parietal                               |
|                            | -13 | -26 | -21 | 0.011  | 2.33     | L Parahippo           | L Cerebellum 3,4,5 L Fusiform                |
|                            | 43  | -76 | 28  | 0.018  | 2.13     | R Mid Occipital       | R Angular                                    |
|                            | -54 | 9   | -12 | 0.018  | 2.12     | L Sup Temporal Pole   | L Sup Temporal L Mid Temporal                |
|                            | 53  | -64 | 24  | 0.030  | 1.9      | R Angular             | R Mid Temporal R Mid Occipital               |
|                            | 58  | -24 | -3  | 0.030  | 1.9      | R Sup Temporal        | R Mid Temporal                               |
|                            | 59  | -53 | -13 | 0.011  | 2.33     | R Inf Temporal        | R Mid Temporal                               |
|                            | 57  | -57 | -2  | 0.046  | 1.69     | R Mid Temporal        | R Inf temporal                               |
|                            | -47 | -73 | 19  | 0.031  | 1.89     | L Mid Occipital       | L Mid Temporal                               |
|                            | 8   | -37 | -1  | 0.036  | 1.82     | R Lingual             | R Precuneus R Thalamus                       |
|                            | 1   | -28 | -4  | 0.041  | 1.74     | R Cerebellum 3,4,5    | R Vermis 3                                   |
|                            | 48  | -13 | 1   | 0.044  | 1.71     | R Sup Temporal        | R Insula R Heschl                            |
| <i>control &gt; autism</i> | -57 | -45 | 37  | 0.003  | 2.77     | L Inf Parietal        | L Supramarginal                              |
|                            | 61  | 2   | 23  | 0.005  | 2.67     | R precentral          | R postcentral                                |
|                            | 45  | -38 | 53  | 0.029  | 1.91     | R Inf Parietal        | R postcentral                                |
|                            | 59  | -27 | 39  | 0.030  | 1.89     | R postcentral         | R Supramarginal                              |
|                            | -7  | -57 | 57  | 0.007  | 2.52     | L precuneus           |                                              |
|                            | 0   | -49 | -4  | 0.018  | 2.11     | Vermis 3,4,5          | L Cerebellum 3                               |
|                            | -21 | -57 | 55  | 0.019  | 2.1      | L Sup Parietal        | L precuneus L Inf Parietal                   |
|                            | -56 | -54 | -3  | 0.024  | 2.01     | L mid temporal        | L Inf temporal                               |
|                            | 63  | -19 | 19  | 0.031  | 1.89     | R Supramarginal       | R Rolandic Oper R Postcentral R Sup Temporal |
|                            | -62 | -8  | 32  | 0.031  | 1.89     | L postcentral         | L Precentral                                 |
|                            | -28 | 12  | 62  | 0.041  | 1.74     | L Mid Frontal         | L Sup Frontal                                |
|                            | 40  | -59 | 54  | 0.044  | 1.71     | R Sup Parietal        | R Inf Parietal                               |
|                            | -29 | 14  | 60  | 0.045  | 1.7      | L Mid Frontal         | L Sup Frontal                                |
|                            | 17  | -42 | 70  | 0.048  | 1.67     | R Postcentral         | R Paracentral Lobule                         |

**Table S3. MNI coordinates and characteristics of peak voxels and associated clusters of between-group scMRI maps, with age as a covariate in the model.**  
UC, uncorrected.
